# Supplementary material
Source: publisher figshare collection journal article supplement (https://gsajournals.figshare.com/ndownloader/files/25205639)
Supplement: Supplementary file 1 [file 25205639]

**Supplemental Figures**

**Figure S1.** Mean proportion of phenotypic variance for startle response explained by each component in the models fitted to the training data set, *i.e.*, GBLUP (**2*g* and **2*e*), TBLUP (**2*t* and **2*e*), GTBLUP (**2*g*, **2*t* and **2*e*), and GTIBLUP (**2*g*, **2*t*, **2*i* and **2*e*). The bars represent the standard error of the mean. The left panel represents females, and the right panel represents males.

**Figure S2.** Mean proportion of phenotypic variance for chill coma recovery explained by each component in the models fitted to the training data set, *i.e.*, GBLUP (**2*g* and **2*e*), TBLUP (**2*t* and **2*e*), GTBLUP (**2*g*, **2*t* and **2*e*), and GTIBLUP (**2*g*, **2*t*, **2*i* and **2*e*). The bars represent the standard error of the mean. The left panel represents females, and the right panel represents males.

**Figure S3.** Prediction accuracy for startle response, measured as mean *r* (on the y-axis) in the test set, obtained by GBLUP, TBLUP, GTBLUP, and GTIBLUP. The bars represent the standard error of the mean. The left panel represents females, and the right panel represents males.

**Figure S4.** Prediction accuracy for chill coma recovery, measured as mean *r* (on the y-axis) in the test set, obtained by GBLUP, TBLUP, GTBLUP, and GTIBLUP. The bars represent the standard error of the mean. The left panel represents females, and the right panel represents males.

**Figure S5.** Comparison between the prediction accuracy for startle response, measured as mean *r* (on the y-axis) in the test set, obtained by TBLUP and Random Forest. The bars represent the standard error of the mean. The left panel represents females, and the right panel represents males.

**Figure S6.** Comparison between the prediction accuracy for chill coma recovery, measured as mean *r* (on the y-axis) in the test set, obtained by TBLUP and Random Forest. The bars represent the standard error of the mean. The left panel represents females, and the right panel represents males.

**Figure S7.** Prediction accuracy for startle response, measured as mean *r* (on the y-axis) in the test set, obtained by the TWAS-TBLUP model at different p-value thresholds for selecting genes. The bars represent the standard error of the mean. The left panel represents females, and the right panel represents males.

**Figure S8.** Prediction accuracy for chill coma recovery, measured as mean *r* (on the y-axis) in the test set, obtained by the TWAS-TBLUP model at different p-value thresholds for selecting genes. The bars represent the standard error of the mean. The left panel represents females, and the right panel represents males.

**Figure S9.** Prediction accuracy for startle response, measured as mean *r* (on the y-axis) in the test set, obtained by using only different numbers of randomly selected genes in the TBLUP model. The bars represent the standard error of the mean. The left panel represents females, and the right panel represents males.

**Figure S10.** Prediction accuracy for chill coma recovery, measured as mean *r* (on the y-axis) in the test set, obtained by using only different numbers of randomly selected genes in the TBLUP model. The bars represent the standard error of the mean. The left panel represents females, and the right panel represents males.

**Figure S11.** Prediction accuracy for startle response, measured as mean *r* (on the y-axis) in the test set, obtained by the GO-GBLUP model. Each point represents the prediction accuracy achieved by a specific GO term; the top 3 most predictive GO terms are spelled out. The black horizontal line represents the accuracy of the baseline GBLUP model. The upper panel represents females, and the lower panel represents males.

**Figure S12.** Prediction accuracy for chill coma recovery, measured as mean *r* (on the y-axis) in the test set, obtained by the GO-GBLUP model. Each point represents the prediction accuracy achieved by a specific GO term; the top 3 most predictive GO terms are spelled out. The black horizontal line represents the accuracy of the baseline GBLUP model. The upper panel represents females, and the lower panel represents males.

**Figure S13.** Prediction accuracy for startle response, measured as mean *r* (on the y-axis) in the test set, obtained by the GO-TBLUP model. Each point represents the prediction accuracy achieved by a specific GO term; the top 3 most predictive GO terms are spelled out. The black horizontal line represents the accuracy of the baseline TBLUP model. The upper panel represents females, and the lower panel represents males.

**Figure S14.** Prediction accuracy for chill coma recovery, measured as mean *r* (on the y-axis) in the test set, obtained by the GO-TBLUP model. Each point represents the prediction accuracy achieved by a specific GO term; the top 3 most predictive GO terms are spelled out. The black horizontal line represents the accuracy of the baseline TBLUP model. The upper panel represents females, and the lower panel represents males.

**Figure S15.** Prediction accuracy for startle response, measured as mean *r* (on the y-axis) in the test set, obtained by the GO-GTBLUP model. Each point represents the prediction accuracy achieved by a specific GO term; the top 3 most predictive GO terms are spelled out. The upper panel represents females, and the lower panel represents males.

**Figure S16.** Prediction accuracy for chill coma recovery, measured as mean *r* (on the y-axis) in the test set, obtained by the GO-GTBLUP model. Each point represents the prediction accuracy achieved by a specific GO term; the top 3 most predictive GO terms are spelled out. The upper panel represents females, and the lower panel represents males.

**Figure S17.** Relationship between prediction accuracy obtained by the GO-GBLUP model, measured as mean *r* (on the y-axis) in the test set, and size of the GO terms, measured as number of variants (on the x-axis), for startle response. Each point represents a specific GO term. The black line represents the linear regression fit. The left panel represents females, and the right panel represents males.

**Figure S18.** Relationship between prediction accuracy obtained by the GO-GBLUP model, measured as mean *r* (on the y-axis) in the test set, and size of the GO terms, measured as number of variants (on the x-axis), for chill coma recovery. Each point represents a specific GO term. The black line represents the linear regression fit. The left panel represents females, and the right panel represents males.

**Figure S19.** Relationship between prediction accuracy obtained by the GO-TBLUP model, measured as mean *r* (on the y-axis) in the test set, and size of the GO terms, measured as number of genes (on the x-axis), for startle response. Each point represents a specific GO term. The black line represents the linear regression fit. The left panel represents females, and the right panel represents males.

**Figure S20.** Relationship between prediction accuracy obtained by the GO-TBLUP model, measured as mean *r* (on the y-axis) in the test set, and size of the GO terms, measured as number of genes (on the x-axis), for chill coma recovery. Each point represents a specific GO term. The black line represents the linear regression fit. The left panel represents females, and the right panel represents males.

**Figure S21.** Relationship between prediction accuracy obtained by the GO-GBLUP model, measured as mean *r* (on the y-axis) in the test set, and mean proportion of variance explained by the GO terms in the training set (on the x-axis), for startle response. Each point represents a specific GO term. The black line represents the linear regression fit. The left panel represents females, and the right panel represents males.

**Figure S22.** Relationship between prediction accuracy obtained by the GO-GBLUP model, measured as mean *r* (on the y-axis) in the test set, and mean proportion of variance explained by the GO terms in the training set (on the x-axis), for chill coma recovery. Each point represents a specific GO term. The black line represents the linear regression fit. The left panel represents females, and the right panel represents males.

**Figure S23.** Relationship between prediction accuracy obtained by the GO-TBLUP model, measured as mean *r* (on the y-axis) in the test set, and mean proportion of variance explained by the GO terms in the training set (on the x-axis), for startle response. Each point represents a specific GO term. The black line represents the linear regression fit. The left panel represents females, and the right panel represents males.

**Figure S24.** Relationship between prediction accuracy obtained by the GO-TBLUP model, measured as mean *r* (on the y-axis) in the test set, and mean proportion of variance explained by the GO terms in the training set (on the x-axis), for chill coma recovery. Each point represents a specific GO term. The black line represents the linear regression fit. The left panel represents females, and the right panel represents males.
